# Supplementary material
Source: PubMed Central journal article supplement (PMC3150935)
Supplement: 1100120108_pnas.1100120108_SI.pdf [file 1100120108_pnas.1100120108_SI.pdf]

# Supporting Information

Öjemalm et al. 10.1073/pnas.1100120108

## SI Text

**Compound Characterization.**  $^1\text{H}$  NMR and  $^{13}\text{C}$  NMR were measured on a Bruker AV300 spectrometer. Chemical shifts are expressed in ppm downfield from internal standard (tetramethylsilane, 0.00 ppm), and coupling constants are reported as hertz. Splitting patterns are indicated as follows: br, broad; s, singlet; d, doublet; t, triplet; q, quartet; m, multiplet. High-resolution mass spectra (HRMS) were obtained with Thermo Exactive spectrometer.

**General Procedure for the Synthesis of Amino Acids with 3,5-Dinitrobenzyl Ester (Procedure A). (*S*)-3,5-Dinitrobenzyl 2-Amino-3-Cyclopropylpropanoate Hydrochloride (for the Introduction of Three-Membered-Ring Side Chain).** The following is a representative experimental procedure of procedure A: To a solution of 2-amino-3-cyclopropylpropanoic acid (30 mg, 0.23 mmol) and  $\text{Boc}_2\text{O}$  (61 mg, 0.28 mmol) in dioxane (0.4 mL) and aqueous 1 M NaOH (0.4 mL),  $\text{NaHCO}_3$  (48 mg, 0.57 mmol) was added at room temperature. After stirring for 5 h, the reaction mixture was diluted by adding ethyl ethanoate (EtOAc). The mixture was washed by saturated aqueous  $\text{KHSO}_4$  and extracted with EtOAc (x3). The combined organic extracts were washed with brine, dried ( $\text{MgSO}_4$ ), and concentrated in vacuo. To a solution of this crude mixture in dimethylformamide (DMF) (0.8 mL), 2, 4-dinitrobenzylchloride (65 mg, 0.30 mmol), and diisopropylethylamine (42 mg, 0.057 mL, 0.42 mmol) were added at room temperature. After stirring for 16 h, the reaction was quenched by adding saturated aqueous  $\text{KHSO}_4$ , and mixture was extracted with  $\text{Et}_2\text{O}$  (x2). The combined organic extracts were washed with water (x2), saturated  $\text{NaHCO}_3$  (x2) and brine, dried ( $\text{MgSO}_4$ ), and concentrated in vacuo. The residue was purified by preparative thin-layer chromatography (PTLC) (hexane/acetone = 4/1) to afford 3,5-dinitrobenzylester (DNB) derivative (40 mg, 44%). To a solution of DNB derivative (20 mg, 0.051 mmol) in EtOAc (0.5 mL), 4 M HCl in EtOAc (2 mL) was added at 0 °C. After stirring for 10 h, starting material was disappeared and the reaction mixture was concentrated in vacuo (16 mg, 95%).  $^1\text{H}$  NMR (300 MHz, acetone- $d_6/\text{D}_2\text{O}$ , 10/1, vol/vol)  $\delta$  0.11–0.18 (m, 2H), 0.40–0.53 (m, 2H), 0.82–0.95 (m, 1H), 1.85–1.96 (m, 2H), 4.38 (t, 1H,  $J = 6.3$  Hz), 5.58 (d, 1H,  $J = 14.1$  Hz), 5.62 (d, 1H,  $J = 14.1$  Hz), 8.75 (d, 2H,  $J = 2.4$  Hz), 8.87 (t, 1H,  $J = 2.4$  Hz);  $^{13}\text{C}$  NMR (75 MHz, acetone- $d_6/\text{D}_2\text{O}$ , 10/1, vol/vol)  $\delta$  4.88, 5.02, 7.24, 35.8, 54.3, 66.3, 119.2, 129.4, 140.9, 149.5, 170.2; HRMS (ESI) calculated for  $\text{C}_{13}\text{H}_{15}\text{N}_3\text{O}_6$ :  $([\text{M} + \text{H}]^+)$   $m/z$  310.1034, found:  $m/z$  310.1032

**(*S*)-3,5-Dinitrobenzyl 2-Amino-3-Cyclopentylpropanoate Hydrochloride (for the Introduction of Five-Membered-Ring Side Chain).** The compound was obtained according to procedure A described above.  $^1\text{H}$  NMR (300 MHz, acetone- $d_6/\text{D}_2\text{O}$ , 10/1, vol/vol)  $\delta$  1.06–1.22 (m, 2H), 1.41–1.63 (m, 4H), 1.75–1.89 (m, 2H), 1.96–2.08 (m, 1H), 4.22 (t, 2H,  $J = 7.5$  Hz), 5.56 (d, 1H,  $J = 14.1$  Hz), 5.61 (d, 1H,  $J = 14.1$  Hz), 8.73 (d, 2H,  $J = 2.1$  Hz), 8.89 (t, 1H,  $J = 2.1$  Hz);  $^{13}\text{C}$  NMR (75 MHz, acetone- $d_6/\text{D}_2\text{O}$ , 10/1, vol/vol)  $\delta$  25.4, 25.5, 32.8, 33.1, 36.8, 37.8, 53.5, 66.2, 119.2, 129.3, 140.9, 149.5, 170.9; HRMS (ESI) calculated for  $\text{C}_{15}\text{H}_{19}\text{N}_3\text{O}_6$ :  $([\text{M} + \text{H}]^+)$   $m/z$  338.1347, found:  $m/z$  338.1344

**(*S*)-3,5-Dinitrobenzyl 2-Amino-3-Cyclohexylpropanoate Hydrochloride (for the Introduction of Six-Membered-Ring Side Chain).** The compound was obtained according to procedure A described above.

$^1\text{H}$  NMR (300 MHz, acetone- $d_6/\text{D}_2\text{O}$ , 10/1, vol/vol)  $\delta$  0.85–1.03 (m, 2H), 1.05–1.32 (m, 3H), 1.52–1.69 (m, 4H), 1.72–1.85 (m, 2H), 1.85–2.03 (m, 2H), 4.30 (t, 1H,  $J = 7.2$  Hz), 5.57 (d, 1H,  $J = 13.8$  Hz), 5.62 (d, 1H,  $J = 13.8$  Hz), 8.77 (d, 2H,  $J = 2.1$  Hz), 8.90 (t, 1H,  $J = 2.1$  Hz);  $^{13}\text{C}$  NMR (75 MHz, acetone- $d_6/\text{D}_2\text{O}$ , 10/1, vol/vol)  $\delta$  26.5, 26.6, 26.9, 33.3, 33.6, 34.3, 51.7, 66.2, 119.2, 129.4, 141.0, 149.5, 170.8; RMS (ESI) calculated for  $\text{C}_{16}\text{H}_{21}\text{N}_3\text{O}_6$ :  $([\text{M} + \text{H}]^+)$   $m/z$  352.1503, found:  $m/z$  352.1497

**(*S*)-3,5-Dinitrobenzyl 2-Aminobutanoate Hydrochloride (for the Introduction of Two-Carbon Side Chain).** The compound was obtained according to procedure A described above.  $^1\text{H}$  NMR (300 MHz, acetone- $d_6/\text{D}_2\text{O}$ , 10/1, vol/vol)  $\delta$  1.09 (t, 3H,  $J = 7.2$  Hz), 2.05–2.22 (m, 2H), 4.35 (t, 1H,  $J = 6.3$  Hz), 5.62 (d, 1H,  $J = 13.8$  Hz), 5.67 (d, 1H,  $J = 13.8$  Hz), 8.78 (d, 2H,  $J = 1.8$  Hz), 8.94 (t, 1H,  $J = 1.8$  Hz);  $^{13}\text{C}$  NMR (75 MHz, acetone- $d_6/\text{D}_2\text{O}$ , 10/1, vol/vol)  $\delta$  9.62, 24.3, 54.8, 66.4, 119.2, 129.4, 140.8, 149.4, 170.0; HRMS (ESI) calculated for  $\text{C}_{11}\text{H}_{13}\text{N}_3\text{O}_6$ :  $([\text{M} + \text{H}]^+)$   $m/z$  284.0877, found:  $m/z$  284.0877

**(*S*)-3,5-Dinitrobenzyl 2-Aminopentanoate Hydrochloride (for the Introduction of Three-Carbon Side Chain).** The compound was obtained according to procedure A described above.  $^1\text{H}$  NMR (300 MHz, acetone- $d_6/\text{D}_2\text{O}$ , 10/1, vol/vol)  $\delta$  0.97 (t, 3H,  $J = 7.2$  Hz), 1.39–1.69 (m, 2H), 1.98–2.16 (m, 2H), 4.38 (t, 1H,  $J = 6.3$  Hz), 5.62 (d, 1H,  $J = 13.5$  Hz), 5.67 (t, 1H,  $J = 13.5$  Hz), 8.78 (d, 2H,  $J = 2.1$  Hz), 8.93 (t, 1H,  $J = 2.1$  Hz);  $^{13}\text{C}$  NMR (75 MHz, acetone- $d_6/\text{D}_2\text{O}$ , 10/1, vol/vol)  $\delta$  13.8, 18.8, 32.9, 53.6, 66.4, 119.1, 129.3, 140.9, 149.5, 170.1; HRMS (ESI) calculated for  $\text{C}_{12}\text{H}_{15}\text{N}_3\text{O}_6$ :  $([\text{M} + \text{H}]^+)$   $m/z$  298.1034, found:  $m/z$  298.1031

**(*S*)-3,5-Dinitrobenzyl 2-Aminohexanoate Hydrochloride (for the Introduction of Four-Carbon Side Chain).** The compound was obtained according to procedure A described above.  $^1\text{H}$  NMR (300 MHz, acetone- $d_6/\text{D}_2\text{O}$ , 10/1, vol/vol)  $\delta$  0.88 (t, 3H,  $J = 7.2$  Hz), 1.30–1.63 (m, 4H), 2.09–2.14 (m, 2H), 4.31 (t, 1H,  $J = 6.3$  Hz), 5.63 (s, 2H), 8.81 (d, 2H,  $J = 2.4$  Hz), 8.92 (t, 1H,  $J = 2.4$  Hz);  $^{13}\text{C}$  NMR (75 MHz, acetone- $d_6/\text{D}_2\text{O}$ , 10/1, vol/vol)  $\delta$  13.3, 22.8, 27.7, 30.7, 53.7, 66.2, 119.2, 129.5, 141.0, 148.6, 169.1; HRMS (ESI) calculated for  $\text{C}_{13}\text{H}_{17}\text{N}_3\text{O}_6$ :  $([\text{M} + \text{H}]^+)$   $m/z$  312.1190, found:  $m/z$  312.1189

**(*S*)-3,5-Dinitrobenzyl 2-Aminoheptanoate Hydrochloride (for the Introduction of Five-Carbon Side Chain).** The compound was obtained according to procedure A described above.  $^1\text{H}$  NMR (300 MHz, acetone- $d_6/\text{D}_2\text{O}$ , 10/1, vol/vol)  $\delta$  0.84 (t, 3H,  $J = 6.6$  Hz), 1.19–1.56 (m, 6H), 2.01–2.16 (m, 2H), 4.38 (t, 1H,  $J = 6.3$  Hz), 5.61 (d, 1H,  $J = 13.2$  Hz), 5.69 (d, 1H,  $J = 13.2$  Hz), 8.78 (s, 2H), 8.94 (s, 1H);  $^{13}\text{C}$  NMR (75 MHz, acetone- $d_6/\text{D}_2\text{O}$ , 10/1, vol/vol)  $\delta$  14.3, 23.0, 25.4, 29.3, 30.9, 32.0, 53.7, 66.4, 119.2, 129.4, 140.9, 149.4, 170.1; HRMS (ESI) calculated for  $\text{C}_{16}\text{H}_{23}\text{N}_3\text{O}_6$ :  $([\text{M} + \text{H}]^+)$   $m/z$  326.1347, found:  $m/z$  326.1342

**(*S*)-3,5-Dinitrobenzyl 2-Amino-octanoate Hydrochloride (for the Introduction of Six-Carbon Side Chain).** The compound was obtained according to procedure A described above.  $^1\text{H}$  NMR (300 MHz, acetone- $d_6/\text{D}_2\text{O}$ , 10/1, vol/vol)  $\delta$  0.83 (t, 3H,  $J = 6.9$  Hz), 1.13–1.63 (m, 8H), 2.02–2.15 (m, 2H), 4.38 (t, 1H,  $J = 6.3$  Hz), 5.61 (d, 1H,  $J = 13.5$  Hz), 5.70 (d, 1H,  $J = 13.5$  Hz), 8.78 (d, 2H,  $J = 2.4$  Hz), 8.94 (t, 1H,  $J = 2.4$  Hz);  $^{13}\text{C}$  NMR (75 MHz, acetone- $d_6/\text{D}_2\text{O}$ , 10/1, vol/vol)  $\delta$  14.3, 23.0, 25.4, 29.3, 30.9, 32.0,

53.7, 66.4, 119.2, 129.4, 140.9, 149.4, 170.1; HRMS (ESI) calculated for  $C_{16}H_{23}N_3O_6$ :  $([M + H]^+) m/z$  340.1503, found:  $m/z$  340.1495

**(S)-3,5-Dinitrobenzyl 2-Aminononanoate Hydrochloride (for the Introduction of Seven-Carbon Side Chain).** The compound was obtained according to procedure A described above.  $^1H$  NMR (300 MHz, acetone- $d_6/D_2O$ , 10/1, vol/vol)  $\delta$  0.80 (t, 3H,  $J = 6.9$  Hz), 1.19–1.32 (m, 12H), 4.10 (t, 1H,  $J = 6.3$  Hz), 5.48 (d, 1H,  $J = 12.9$  Hz), 5.52 (d, 1H,  $J = 12.9$  Hz), 8.71 (s, 2H), 8.89 (s, 1H);  $^{13}C$  NMR (75 MHz, acetone- $d_6/D_2O$ , 10/1, vol/vol)  $\delta$  14.3, 23.2, 25.8, 29.7, 29.9, 32.4, 32.8, 54.2, 65.7, 119.1, 128.5, 129.2, 141.4, 149.5; HRMS (ESI) calculated for  $C_{16}H_{23}N_3O_6$ :  $([M + H]^+) m/z$  354.1660, found:  $m/z$  354.1657

**(S)-3,5-Dinitrobenzyl 2-Aminodecanoate Hydrochloride (for the Introduction of Eight-Carbon Side Chain).** The compound was obtained according to procedure A described above.  $^1H$  NMR (300 MHz, acetone- $d_6/D_2O$ , 10/1, vol/vol)  $\delta$  0.688 (t, 3H,  $J = 7.2$  Hz), 0.95–1.33 (m, 12H), 1.90 (dt, 2H,  $J = 9.3, 6.0$  Hz), 4.21 (t, 1H,  $J = 6.0$  Hz), 5.39 (d, 1H,  $J = 13.2$  Hz), 5.54 (d, 1H,  $J = 13.2$  Hz), 8.65 (d, 2H,  $J = 1.8$  Hz), 8.96 (t, 1H,  $J = 1.8$  Hz);  $^{13}C$  NMR (75 MHz, acetone- $d_6/D_2O$ , 10/1, vol/vol)  $\delta$  13.4, 22.0, 23.9, 28.1, 28.28, 28.35, 29.7, 31.1, 52.7, 65.7, 119.0, 128.8, 139.2, 148.4, 169.8; HRMS (ESI) calculated for  $C_{17}H_{25}N_3O_6$ :  $([M + H]^+) m/z$  368.1816, found:  $m/z$  368.1812

**General Procedure for the Synthesis of Amino Acids with Cyanomethyl Ester (CME) (Procedure B). (S)-Cyanomethyl 2-Amino-3-(1-Methyl-1H-indol-3-yl) Propanoate Trifluoroacetate (for the Introduction of Me-Trp).** The following is a representative experimental procedure of Procedure B: To a solution of 2-amino-3-(1-methyl-1H-indol-3-yl) propanoic acid (50 mg, 0.23 mmol) and *N*-[2-(trimethylsilyl)ethoxycarbonyl-oxy]succinimide (79 mg, 0.31 mmol) in  $H_2O$  (0.4 mL) and THF (0.4 mL),  $NaHCO_3$  (48 mg, 0.57 mmol) was added at room temperature. After stirring for 5 h, the reaction mixture was diluted by adding EtOAc. The mixture was washed by saturated aqueous  $KHSO_4$  and extracted with EtOAc (x3). The combined organic extracts were washed with brine, dried ( $MgSO_4$ ), and concentrated in vacuo. To a solution of this crude mixture in DMF (0.8 mL), chloroacetonitrile (25 mg, 0.021 mL, 0.33 mmol) and triethylamine (76 mg, 0.10 mL, 0.75 mmol) were added at room temperature. After stirring for 16 h, the reaction was quenched by adding saturated aqueous  $KHSO_4$ , and mixture was extracted with  $Et_2O$  (x2). The combined organic extracts were washed with water (x2), saturated  $NaHCO_3$  (x2) and brine, dried ( $MgSO_4$ ), and concentrated in vacuo. The residue was purified by PTLC (hexane/EtOAc = 2/1) to afford CME derivative (72 mg, 78%). To a solution of DNB derivative (20 mg, 0.051 mmol) in EtOAc (0.5 mL), CME derivative (72 mg, 78%). To a solution of CME derivative (13 mg, 0.032 mmol) in  $CH_2Cl_2$  (1 mL) was added trifluoroacetic acid (2 mL) at 0°C. After stirring for 10 h, starting material was disappeared. The reaction mixture was concentrated in vacuo (13 mg, quantitative).  $^1H$  NMR (300 MHz, acetone- $d_6/D_2O$ , 10/1, vol/vol)  $\delta$  3.50 (dd, 1H,  $J = 6.6, 2.4$  Hz), 3.79 (s, 3H), 4.60 (t, 1H,  $J = 6.6$  Hz), 4.97 (d, 1H,  $J = 15.9$  Hz), 5.57 (d, 1H,  $J = 15.9$  Hz), 7.18 (ddd, 1H,  $J = 8.1, 7.2, 0.9$  Hz), 7.24 (s, 1H), 7.30 (ddd, 1H,  $J = 8.1, 7.2, 0.9$  Hz), 7.46 (d, 1H,  $J = 8.1$  Hz), 7.62 (d, 1H,  $J = 8.1$  Hz);  $^{13}C$  NMR (75 MHz, acetone- $d_6/D_2O$ , 10/1, vol/vol)  $\delta$  25.7, 32.2, 50.2, 53.2, 104.7, 110.1, 114.7, 116.6 (q, 1C,  $J = 288$  Hz), 118.2, 119.6, 122.2, 127.0, 129.5, 137.1, 161.9 (q, 1C,  $J = 35$  Hz), 168.5; HRMS (ESI) calculated for  $C_{14}H_{15}N_3O_2$ :  $([M + H]^+) m/z$  258.1237, found:  $m/z$  258.1227

**(S)-Cyanomethyl 2-Amino-3-(1H-Indol-3-yl) Propanoate Trifluoroacetate (for the Introduction of Trp).** The compound was obtained

according to procedure B described above.  $^1H$  NMR (300 MHz, acetone- $d_6/D_2O$ , 10/1, vol/vol)  $\delta$  2.78 (s, 1H), 3.54 (dd, 1H,  $J = 15.3, 6.6$  Hz), 3.59 (dd, 1H,  $J = 15.3, 6.6$  Hz), 4.63 (t, 1H,  $J = 6.6$  Hz), 5.01 (d, 1H,  $J = 15.9$  Hz), 5.07 (d, 1H,  $J = 15.9$  Hz), 7.22 (ddd, 1H,  $J = 8.1, 6.9, 1.5$  Hz), 7.31 (ddd, 1H,  $J = 8.1, 6.9, 0.9$  Hz), 7.36 (s, 1H), 7.56 (dd, 1H,  $J = 6.9, 1.5$  Hz), 7.65 (dd, 1H,  $J = 6.9, 1.5$  Hz);  $^{13}C$  NMR (75 MHz, acetone- $d_6/D_2O$ , 10/1, vol/vol)  $\delta$  25.6, 50.3, 53.2, 105.7, 112.1, 116.4 (q, 1C,  $J = 290$  Hz), 114.4, 117.9, 119.7, 122.3, 125.4, 126.4, 136.3, 168.6; HRMS (ESI) calculated for  $C_{13}H_{13}N_3O_2$ :  $([M + H]^+) m/z$  244.1081, found:  $m/z$  244.1080

**(S)-Cyanomethyl 2-Amino-3-(4-Methoxyphenyl) Propanoate Trifluoroacetate (for the Introduction of Me-Tyr).** The compound was obtained according to procedure B described above.  $^1H$  NMR (300 MHz, acetone- $d_6/D_2O$ , 10/1, vol/vol)  $\delta$  3.16 (d, 1H,  $J = 6.6$  Hz), 3.70 (s, 3H), 4.41 (t, 1H,  $J = 6.6$  Hz), 4.90 (d, 1H,  $J = 15.9$  Hz), 4.96 (d, 1H,  $J = 15.9$  Hz), 6.86–6.89 (m, 2H), 7.10–7.14 (m, 2H);  $^{13}C$  NMR (75 MHz, acetone- $d_6/D_2O$ , 10/1, vol/vol)  $\delta$  34.7, 50.3, 53.9, 55.3, 114.7, 116.4 (q, 1C,  $J = 290$  Hz), 125.6, 130.8, 158.7, 162.7 (q, 1C,  $J = 35$  Hz), 168.3; HRMS (ESI) calculated for  $C_{12}H_{14}N_2O_3$ :  $([M + H]^+) m/z$  235.1077, found:  $m/z$  235.1076

**(S)-Cyanomethyl 2-Amino-3-(4-Hydroxyphenyl) Propanoate Trifluoroacetate (for the Introduction of Tyr).** The compound was obtained according to procedure B described above.  $^1H$  NMR (300 MHz,  $D_2O$ , the minor rotamer were marked with an asterisk)  $\delta$  3.03–3.25 (m, 2H), 4.27–4.44 (m, 1H), 4.48\* (d, 0.3H,  $J = 14.4$  Hz), 4.54\* (d, 0.3H,  $J = 14.4$  Hz), 4.91 (d, 0.7H,  $J = 15.9$  Hz), 4.97 (d, 0.7H,  $J = 15.9$  Hz), 6.75–6.82 (m, 2H), 7.03–7.11 (m, 2H);  $^{13}C$  NMR (75 MHz,  $D_2O$ )  $\delta$  34.6, 50.3, 53.9, 114.7, 115.89, 115.97, 116.2 (q, 1C,  $J = 290$  Hz), 124.9, 130.77, 130.82, 155.3, 162.7 (q, 1C,  $J = 35$  Hz), 168.3; HRMS (ESI) calculated for  $C_{12}H_{14}N_2O_3$ :  $([M + H]^+) m/z$  221.0921, found:  $m/z$  221.0933

**(S)-Cyanomethyl 2-Amino-3-(Benzo[b]thiophen-3-yl) Propanoate Trifluoroacetate (for the Introduction of Benzothiophene Side Chain).** The compound was obtained according to procedure B described above.  $^1H$  NMR (300 MHz, acetone- $d_6/D_2O$ , 10/1, vol/vol)  $\delta$  3.60 (dd, 1H,  $J = 14.4, 7.2$  Hz), 3.67 (dd, 1H,  $J = 14.4, 7.2$  Hz), 4.67 (t, 1H,  $J = 7.2$  Hz), 4.96 (d, 1H,  $J = 15.9$  Hz), 5.02 (d, 1H,  $J = 15.9$  Hz), 7.45–7.56 (m, 2H), 7.57 (s, 1H), 7.85 (dd, 1H,  $J = 6.6, 1.2$  Hz), 8.01 (dd, 1H,  $J = 6.9, 1.2$  Hz);  $^{13}C$  NMR (75 MHz, acetone- $d_6/D_2O$ , 10/1, vol/vol)  $\delta$  28.4, 50.4, 52.4, 114.5, 116.4 (q, 1C,  $J = 290$  Hz), 121.1, 123.3, 124.7, 125.0, 126.8, 127.6, 137.7, 140.3, 162.7 (q, 1C,  $J = 35$  Hz), 168.2; HRMS (ESI) calculated for  $C_{13}H_{12}N_2O_2S$ :  $([M + H]^+) m/z$  261.0692, found:  $m/z$  261.0684

**(S)-Cyanomethyl 2-Amino-3-(4-Aminophenyl) Propanoate Trifluoroacetate (for the Introduction of Aniline Side Chain).** The compound was obtained according to procedure B described above.  $^1H$  NMR (300 MHz, DMSO- $d_6/D_2O$ , 10/1, vol/vol, the minor rotamer was marked with an asterisk)  $\delta$  3.14–3.34 (m, 2H), 4.35–4.48 (m, 1H), 4.53\* (d, 0.4H,  $J = 15.3$  Hz), 4.60\* (d, 0.4H,  $J = 15.3$  Hz), 5.07 (s, 1.2H), 7.33–7.51 (m, 4H);  $^{13}C$  NMR (75 MHz, DMSO- $d_6/D_2O$ , 10/1, vol/vol)  $\delta$  34.9, 50.3, 53.4, 114.6, 116.4 (q, 1C,  $J = 288$  Hz), 118.3, 131.0, 131.2, 134.7, 168.1; HRMS (ESI) calculated for  $C_{13}H_{12}N_2O_2S$ :  $([M + H]^+) m/z$  220.1081, found:  $m/z$  220.1081

**(S)-Cyanomethyl 2-Amino-3-(Biphenyl-4-yl) Propanoate Trifluoroacetate (for the Introduction of Biphenyl).** The compound was obtained according to procedure B described above.  $^1H$  NMR (300 MHz, acetone- $d_6/D_2O$ , 10/1, vol/vol, the minor rotamer was marked with an asterisk)  $\delta$  3.44–3.65 (m, 2H), 4.76\* (br, 0.25H), 5.02–5.15

(m, 2H), 5.35 (dd, 0.75H,  $J = 9.9, 4.5$  Hz), 7.33–7.41 (m, 1H), 7.44–7.52 (m, 4H), 7.61–7.70 (m, 4H);  $^{13}\text{C}$  NMR (75 MHz, acetone- $d_6/\text{D}_2\text{O}$ , 10/1, vol/vol)  $\delta$  36.9, 50.8, 62.7, 115.3, 127.7, 127.99, 128.05, 128.2, 128.3, 129.71, 129.75, 129.77, 131.6, 135.8, 140.9, 141.2, 169.2; HRMS (ESI) calculated for  $\text{C}_{17}\text{H}_{16}\text{N}_2\text{O}_2$ :  $([\text{M} + \text{H}]^+)$   $m/z$  281.1285, found:  $m/z$  281.1285

**(*S*)-Cyanomethyl 2-Amino-3-(Naphthalen-1-yl)Propanoate Trifluoroacetate (for the Introduction of 1-Naphthyl Side Chain).** The compound was obtained according to procedure B described above.  $^1\text{H}$  NMR (300 MHz, acetone- $d_6/\text{D}_2\text{O}$ , 10/1, vol/vol, the minor rotamer was marked with an asterisk)  $\delta$  3.70–3.87 (m, 1H), 3.96–4.11 (m, 1H), 4.70 (t, 0.7H,  $J = 7.5$  Hz), 4.89 (d, 0.7H,  $J = 16.2$  Hz), 4.95 (d, 0.7H,  $J = 16.2$  Hz), 5.05\* (d, 0.3H,  $J = 16.5$  Hz), 5.11\* (d, 0.3H,  $J = 16.5$  Hz), 5.22\* (dd, 0.3H,  $J = 10.2, 3.9$  Hz), 7.43–7.64 (m, 4H), 7.89 (d, 1H,  $J = 8.1$  Hz), 7.96 (dd, 1H,  $J = 8.1, 1.2$  Hz), 8.33 (dd, 1H,  $J = 7.5, 7.2$  Hz);  $^{13}\text{C}$  NMR (75 MHz, acetone- $d_6/\text{D}_2\text{O}$ , 10/1, vol/vol)  $\delta$  34.6, 50.6, 54.3, 115.1, 124.1, 126.4, 126.9, 127.6, 129.4, 129.4, 129.9, 131.5, 132.7, 134.9, 169.3; HRMS (ESI) calculated for  $\text{C}_{15}\text{H}_{14}\text{N}_2\text{O}_2$ :  $([\text{M} + \text{H}]^+)$   $m/z$  255.1128, found:  $m/z$  255.1119

**(*S*)-Cyanomethyl 2-Amino-3-(Naphthalen-6-yl) Propanoate Trifluoroacetate (for the Introduction of 2-Naphthyl Side Chain).** The compound

was obtained according to procedure B described above.  $^1\text{H}$  NMR (300 MHz, acetone- $d_6/\text{D}_2\text{O}$ , 10/1, vol/vol)  $\delta$  3.43 (dd, 1H,  $J = 15.3, 6.9$  Hz), 3.48 (dd, 1H,  $J = 15.3, 6.9$  Hz), 4.67 (t, 1H,  $J = 6.9$  Hz), 4.94 (d, 1H,  $J = 16.2$  Hz), 5.03 (d, 1H,  $J = 16.2$  Hz), 7.37 (dd, 1H,  $J = 8.7, 1.8$  Hz), 7.46–7.54 (m, 2H), 7.74 (s, 1H), 7.78–7.92 (m, 3H);  $^{13}\text{C}$  NMR (75 MHz, acetone- $d_6/\text{D}_2\text{O}$ , 10/1, vol/vol)  $\delta$  35.8, 50.2, 53.8, 114.6, 116.5 (q, 1C,  $J = 290$  Hz), 126.6, 126.8, 126.9, 127.75, 127.78, 128.5, 129.1, 130.9, 132.7, 133.2, 162.5 (q, 1C,  $J = 35$  Hz), 168.2; HRMS (ESI) calculated for  $\text{C}_{15}\text{H}_{14}\text{N}_2\text{O}_2$ :  $([\text{M} + \text{H}]^+)$   $m/z$  255.1128, found:  $m/z$  255.1117

**(*S*)-Cyanomethyl 2-Amino-3-Phenylpropanoate Hydrochloride (for the Introduction of Phe).** The compound was obtained according to procedure B described above and also reported in ref. 1.  $^1\text{H}$  NMR (300 MHz, DMSO- $d_6$ , the minor rotamers was marked with asterisks)  $\delta$  3.08–3.35 (m, 2H), 4.28–4.44 (m, 1H), 4.45\* (d, 0.2H,  $J = 15.6$  Hz), 4.54\* (d, 0.2H,  $J = 15.6$  Hz), 4.76\*\* (d, 0.2H,  $J = 14.7$  Hz), 4.82\*\* (d, 0.2H,  $J = 14.7$  Hz), 5.02 (d, 0.6H,  $J = 16.5$  Hz), 7.20–7.48 (m, 5H), 8.88 (s, 3H);  $^{13}\text{C}$  NMR (75 MHz, DMSO- $d_6$ )  $\delta$  35.6, 50.0, 53.0, 115.1, 127.3, 128.5, 128.6, 129.4, 129.5, 168.1; HRMS (ESI) calculated for  $\text{C}_{11}\text{H}_{12}\text{N}_2\text{O}_2$ :  $([\text{M} + \text{H}]^+)$   $m/z$  284.0877, found:  $m/z$  284.0877

1. Saito H, Kourouklis D, Suga H (2001) An in vitro evolved precursor tRNA with aminoacylation activity. *EMBO J* 20:1797–1806.

**Table S1. Measured  $\Delta G_{\text{app}}$  values and standard deviations (three or four measurements) in kcal/mol for all sequences and amino acids in the study**

H segments with G flanks (helix length 19)

| ID                                             | Amino acid | Sequence of test helix H3     | $\Delta G_{\text{app}}^{\text{meas}}$ | SD   |
|------------------------------------------------|------------|-------------------------------|---------------------------------------|------|
| <b>(S)-2-aminobutanoic acid</b>                |            |                               |                                       |      |
| 1                                              |            | GGPG*AAALAAAAAAAAALAAAAGPGG   | 0.72                                  | 0.05 |
| 2                                              |            | GGPGAA*ALAAAAAAAAALAAAAGPGG   | 0.36                                  | 0.04 |
| 3                                              |            | GGPGAAAAAL*AAAAAAAAALAAAAGPGG | 0.52                                  | 0.03 |
| 4                                              |            | GGPGAAAAALAAAA*AAAAALAAAAGPGG | 0.55                                  | 0.12 |
| 5                                              |            | GGPGAAAAALAAAAAAAA*LAAAAGPGG  | 0.49                                  | 0.03 |
| 6                                              |            | GGPGAAAAALAAAAAAAAALAAAGPGG   | 0.58                                  | 0.04 |
| 7                                              |            | GGPGAAAAALAAAAAAAAALAAA*GPGG  | 0.53                                  | 0.11 |
| <b>(S)-2-aminopentanoic acid (L-norvaline)</b> |            |                               |                                       |      |
| 8                                              |            | GGPG*AAALAAAAAAAAALAAAAGPGG   | 0.36                                  | 0.05 |
| 9                                              |            | GGPGAA*ALAAAAAAAAALAAAAGPGG   | 0.31                                  | 0.03 |
| 10                                             |            | GGPGAAAAAL*AAAAAAAAALAAAAGPGG | 0.27                                  | 0.07 |
| 11                                             |            | GGPGAAAAALAAAA*AAAAALAAAAGPGG | 0.28                                  | 0.03 |
| 12                                             |            | GGPGAAAAALAAAAAAAA*LAAAAGPGG  | 0.36                                  | 0.03 |
| 13                                             |            | GGPGAAAAALAAAAAAAAALAAAGPGG   | 0.36                                  | 0.03 |
| 14                                             |            | GGPGAAAAALAAAAAAAAALAAA*GPGG  | 0.41                                  | 0.06 |
| <b>(S)-2-aminohexanoic acid (L-norleucine)</b> |            |                               |                                       |      |
| 15                                             |            | GGPG*AAALAAAAAAAAALAAAAGPGG   | 0.12                                  | 0.01 |
| 16                                             |            | GGPGAA*ALAAAAAAAAALAAAAGPGG   | 0.05                                  | 0.05 |
| 17                                             |            | GGPGAAAAAL*AAAAAAAAALAAAAGPGG | -0.02                                 | 0.03 |
| 18                                             |            | GGPGAAAAALAAAA*AAAAALAAAAGPGG | 0.11                                  | 0.04 |
| 19                                             |            | GGPGAAAAALAAAAAAAA*LAAAAGPGG  | 0.30                                  | 0.06 |
| 20                                             |            | GGPGAAAAALAAAAAAAAALAAAGPGG   | 0.21                                  | 0.07 |
| 21                                             |            | GGPGAAAAALAAAAAAAAALAAA*GPGG  | 0.23                                  | 0.03 |
| <b>(S)-2-aminoheptanoic acid</b>               |            |                               |                                       |      |
| 22                                             |            | GGPG*AAALAAAAAAAAALAAAAGPGG   | -0.02                                 | 0.09 |
| 23                                             |            | GGPGAA*ALAAAAAAAAALAAAAGPGG   | -0.28                                 | 0.07 |
| 24                                             |            | GGPGAAAAAL*AAAAAAAAALAAAAGPGG | -0.34                                 | 0.04 |
| 25                                             |            | GGPGAAAAALAAAA*AAAAALAAAAGPGG | -0.28                                 | 0.10 |
| 26                                             |            | GGPGAAAAALAAAAAAAA*LAAAAGPGG  | -0.07                                 | 0.05 |
| 27                                             |            | GGPGAAAAALAAAAAAAAALAAAGPGG   | 0.06                                  | 0.05 |
| 28                                             |            | GGPGAAAAALAAAAAAAAALAAA*GPGG  | 0.03                                  | 0.09 |



## H segments with G flanks (helix length 19)

| ID                                                   | Amino acid | Sequence of test helix H3    | $\Delta G^{\text{meas}}_{\text{app}}$ | SD   |
|------------------------------------------------------|------------|------------------------------|---------------------------------------|------|
| (S)-2-amino-3-(4-aminophenyl)propanoic acid          |            |                              |                                       |      |
| 85                                                   |            | GGPG*AAALALAAAAALALAAAAGPGG  | -0.71                                 | 0.01 |
| 86                                                   |            | GGPGAA*ALALAAAAALALAAAAGPGG  | -0.41                                 | 0.04 |
| 87                                                   |            | GGPGAAAAL*LAAAAALALAAAAGPGG  | -0.06                                 | 0.09 |
| 88                                                   |            | GGPGAAAALALAA*ALALAAAAGPGG   | 0.15                                  | 0.07 |
| 89                                                   |            | GGPGAAAALALAAAAAL*LAAAAGPGG  | -0.39                                 | 0.01 |
| 90                                                   |            | GGPGAAAALALAAAAALALA*AAGPGG  | -0.94                                 | 0.13 |
| 91                                                   |            | GGPGAAAALALAAAAALALAAA*GP GG | -0.76                                 | 0.08 |
| L-tyrosine                                           |            |                              |                                       |      |
| 92                                                   |            | GGPG*AAALAAAAAAAAALAAAAGPGG  | 0.60                                  | 0.12 |
| 93                                                   |            | GGPGAA*ALAAAAAAAAALAAAAGPGG  | 0.78                                  | 0.07 |
| 94                                                   |            | GGPGAAAAL*AAAAAAAAALAAAAGPGG | 0.88                                  | 0.11 |
| 95                                                   |            | GGPGAAAALAAAA*AAAAALAAAAGPGG | 1.04                                  | 0.11 |
| 96                                                   |            | GGPGAAAALAAAAAAAAA*LAAAAGPGG | 0.90                                  | 0.03 |
| 97                                                   |            | GGPGAAAALAAAAAAAAALA*AAGPGG  | 0.43                                  | 0.05 |
| 98                                                   |            | GGPGAAAALAAAAAAAAALAAA*GP GG | 0.77                                  | 0.05 |
| L-tyrosine                                           |            |                              |                                       |      |
| 99                                                   |            | GGPG*AAALALAAAAALALAAAAGPGG  | -0.82                                 | 0.12 |
| 100                                                  |            | GGPGAA*ALALAAAAALALAAAAGPGG  | -0.62                                 | 0.01 |
| 101                                                  |            | GGPGAAAAL*LAAAAALALAAAAGPGG  | -0.49                                 | 0.03 |
| 102                                                  |            | GGPGAAAALALAA*ALALAAAAGPGG   | 0.18                                  | 0.02 |
| 103                                                  |            | GGPGAAAALALAAAAAL*LAAAAGPGG  | -0.62                                 | 0.08 |
| 104                                                  |            | GGPGAAAALALAAAAALALA*AAGPGG  | -1.11                                 | 0.09 |
| 105                                                  |            | GGPGAAAALALAAAAALALAAA*GP GG | -0.90                                 | 0.07 |
| L-tryptophan                                         |            |                              |                                       |      |
| 106                                                  |            | GGPG*AAALAAAAAAAAALAAAAGPGG  | 0.07                                  | 0.04 |
| 107                                                  |            | GGPGAA*ALAAAAAAAAALAAAAGPGG  | 0.23                                  | 0.05 |
| 108                                                  |            | GGPGAAAAL*AAAAAAAAALAAAAGPGG | 0.66                                  | 0.05 |
| 109                                                  |            | GGPGAAAALAAAA*AAAAALAAAAGPGG | 0.77                                  | 0.05 |
| 110                                                  |            | GGPGAAAALAAAAAAAAA*LAAAAGPGG | 0.66                                  | 0.08 |
| 111                                                  |            | GGPGAAAALAAAAAAAAALA*AAGPGG  | 0.25                                  | 0.09 |
| 112                                                  |            | GGPGAAAALAAAAAAAAALAAA*GP GG | 0.43                                  | 0.12 |
| L-tryptophan                                         |            |                              |                                       |      |
| 113                                                  |            | GGPG*AAALALAAAAALALAAAAGPGG  | -1.41                                 | 0.17 |
| 114                                                  |            | GGPGAA*ALALAAAAALALAAAAGPGG  | -1.04                                 | 0.08 |
| 115                                                  |            | GGPGAAAAL*LAAAAALALAAAAGPGG  | -0.69                                 | 0.07 |
| 116                                                  |            | GGPGAAAALALAA*ALALAAAAGPGG   | -0.37                                 | 0.09 |
| 117                                                  |            | GGPGAAAALALAAAAAL*LAAAAGPGG  | -0.92                                 | 0.03 |
| 118                                                  |            | GGPGAAAALALAAAAALALA*AAGPGG  | -1.47                                 | 0.18 |
| 119                                                  |            | GGPGAAAALALAAAAALALAAA*GP GG | -1.19                                 | 0.07 |
| (S)-2-amino-3-(1-methyl-1H-indol-3-yl)propanoic acid |            |                              |                                       |      |
| 120                                                  |            | GGPG*AAALAAAAAAAAALAAAAGPGG  | 0.06                                  | 0.06 |
| 121                                                  |            | GGPGAA*ALAAAAAAAAALAAAAGPGG  | 0.15                                  | 0.03 |
| 122                                                  |            | GGPGAAAAL*AAAAAAAAALAAAAGPGG | 0.17                                  | 0.10 |
| 123                                                  |            | GGPGAAAALAAAA*AAAAALAAAAGPGG | 0.15                                  | 0.09 |
| 124                                                  |            | GGPGAAAALAAAAAAAAA*LAAAAGPGG | 0.41                                  | 0.09 |
| 125                                                  |            | GGPGAAAALAAAAAAAAALA*AAGPGG  | 0.09                                  | 0.02 |
| 126                                                  |            | GGPGAAAALAAAAAAAAALAAA*GP GG | 0.17                                  | 0.08 |
| (S)-2-amino-3-(benzo[b]thiophen-3-yl)propanoic acid  |            |                              |                                       |      |
| 127                                                  |            | GGPG*AAALAAAAAAAAALAAAAGPGG  | -0.05                                 | 0.09 |
| 128                                                  |            | GGPGAA*ALAAAAAAAAALAAAAGPGG  | -0.12                                 | 0.03 |
| 129                                                  |            | GGPGAAAAL*AAAAAAAAALAAAAGPGG | -0.18                                 | 0.01 |
| 130                                                  |            | GGPGAAAALAAAA*AAAAALAAAAGPGG | -0.20                                 | 0.01 |
| 131                                                  |            | GGPGAAAALAAAAAAAAA*LAAAAGPGG | 0.09                                  | 0.11 |
| 132                                                  |            | GGPGAAAALAAAAAAAAALA*AAGPGG  | -0.02                                 | 0.03 |
| 133                                                  |            | GGPGAAAALAAAAAAAAALAAA*GP GG | -0.19                                 | 0.02 |
| (S)-2-amino-3-(naphthalen-1-yl)propanoic acid        |            |                              |                                       |      |
| 134                                                  |            | GGPG*AAALAAAAAAAAALAAAAGPGG  | -0.11                                 | 0.00 |
| 135                                                  |            | GGPGAA*ALAAAAAAAAALAAAAGPGG  | -0.14                                 | 0.02 |
| 136                                                  |            | GGPGAAAAL*AAAAAAAAALAAAAGPGG | -0.20                                 | 0.04 |
| 137                                                  |            | GGPGAAAALAAAA*AAAAALAAAAGPGG | -0.10                                 | 0.05 |
| 138                                                  |            | GGPGAAAALAAAAAAAAA*LAAAAGPGG | 0.03                                  | 0.01 |
| 139                                                  |            | GGPGAAAALAAAAAAAAALA*AAGPGG  | -0.11                                 | 0.02 |

## H segments with G flanks (helix length 19)

| ID  | Amino acid                                     | Sequence of test helix H3        | $\Delta G_{app}^{meas}$ | SD   |
|-----|------------------------------------------------|----------------------------------|-------------------------|------|
| 140 |                                                | GGPGAAAALAAAAAAAAALAAA*GPGG      | -0.06                   | 0.00 |
|     | (S)-2-amino-3-(naphthalen-6-yl) propanoic acid |                                  |                         |      |
| 141 |                                                | GGPG*AAALAAAAAAAAALAAAAGPGG      | -0.03                   | 0.08 |
| 142 |                                                | GGPGAA*ALAAAAAAAAALAAAAGPGG      | -0.04                   | 0.04 |
| 143 |                                                | GGPGAAAAL*AAAAAAAAALAAAAGPGG     | -0.15                   | 0.00 |
| 144 |                                                | GGPGAAAALAAAA*AAAAALAAAAGPGG     | -0.24                   | 0.04 |
| 145 |                                                | GGPGAAAALAAAAAAAA*LAAAAGPGG      | 0.01                    | 0.05 |
| 146 |                                                | GGPGAAAALAAAAAAAAALA*AAGPGG      | -0.07                   | 0.03 |
| 147 |                                                | GGPGAAAALAAAAAAAAALAAA*GPGG      | -0.03                   | 0.06 |
|     | (S)-2-amino-3-(biphenyl-4-yl) propanoic acid   |                                  |                         |      |
| 148 |                                                | GGPG*AAALAAAAAAAAALAAAAGPGG      | -0.06                   | 0.02 |
| 149 |                                                | GGPGAA*ALAAAAAAAAALAAAAGPGG      | -0.15                   | 0.05 |
| 150 |                                                | GGPGAAAAL*AAAAAAAAALAAAAGPGG     | -0.43                   | 0.02 |
| 151 |                                                | GGPGAAAALAAAA*AAAAALAAAAGPGG     | -0.37                   | 0.07 |
| 152 |                                                | GGPGAAAALAAAAAAAA*LAAAAGPGG      | -0.07                   | 0.02 |
| 153 |                                                | GGPGAAAALAAAAAAAAALA*AAGPGG      | -0.07                   | 0.00 |
| 154 |                                                | GGPGAAAALAAAAAAAAALAAA*GPGG      | -0.21                   | 0.07 |
|     | L-alanine                                      |                                  |                         |      |
| 155 |                                                | GGPGAAAALAAAAAAAAALAAAAGPGG      | 0.66                    | 0.06 |
|     | L-valine                                       |                                  |                         |      |
| 156 |                                                | GGPGAAAALAAAAVAAAAALAAAAGPGG     | 0.18                    | 0.03 |
|     | L-leucine                                      |                                  |                         |      |
| 157 |                                                | GGPGAAAALAAAAALAAAALAAAAGPGG     | 0.10                    | 0.02 |
|     | L-isoleucine                                   |                                  |                         |      |
| 158 |                                                | GGPGAAAALAAAAIAAAAALAAAAGPGG     | -0.07                   | 0.05 |
|     | <i>amino acid</i>                              | <i>sequence of test helix H4</i> | $\Delta G_{app}^{meas}$ | SD   |
|     | (S)-2-aminooctanoic acid                       |                                  |                         |      |
| 159 |                                                | GGPG*AAAAAAAAAAAAAAAAAAGPGG      | 0.52                    | 0.09 |
| 160 |                                                | GGPGAA*AAAAAAAAAAAAAAAAAAGPGG    | 0.49                    | 0.05 |
| 161 |                                                | GGPGAAAAA*AAAAAAAAAAAAAAAAAAGPGG | 0.34                    | 0.08 |
| 162 |                                                | GGPGAAAAAAAAA*AAAAAAAAAAGPGG     | 0.29                    | 0.05 |
| 163 |                                                | GGPGAAAAAAAAA*AAAAAAGPGG         | 0.18                    | 0.03 |
| 164 |                                                | GGPGAAAAAAAAA*AAAGPGG            | 0.36                    | 0.10 |
| 165 |                                                | GGPGAAAAAAAAA*GPGG               | 0.29                    | 0.10 |
|     | (S)-2-aminodecanoic acid                       |                                  |                         |      |
| 166 |                                                | GGPG*AAAAAAAAAAAAAAAAAAGPGG      | 0.16                    | 0.07 |
| 167 |                                                | GGPGAA*AAAAAAAAAAAAAAAAAAGPGG    | 0.31                    | 0.05 |
| 168 |                                                | GGPGAAAAA*AAAAAAAAAAAAAAAAAAGPGG | 0.19                    | 0.05 |
| 169 |                                                | GGPGAAAAAAAAA*AAAAAAAAAAGPGG     | 0.04                    | 0.04 |
| 170 |                                                | GGPGAAAAAAAAA*AAAAAAGPGG         | -0.03                   | 0.11 |
| 171 |                                                | GGPGAAAAAAAAA*AAAGPGG            | -0.02                   | 0.15 |
| 172 |                                                | GGPGAAAAAAAAA*GPGG               | 0.12                    | 0.08 |
|     | L-alanine                                      |                                  |                         |      |
| 173 |                                                | GGPGAAAAAAAAAAAAAAAAAAGPGG       | 1.20                    | 0.10 |
